# Supplementary material for: Can T-carbon serve as a Li storage material and a Li battery anode?
Source: Royal Society of Chemistry journal article supplement (doi:10.1039/d1ma00328c), 2021-01-01
Supplement: d1ma00328c3.pdf [file d1ma00328c3.pdf]

## Supplementary Information

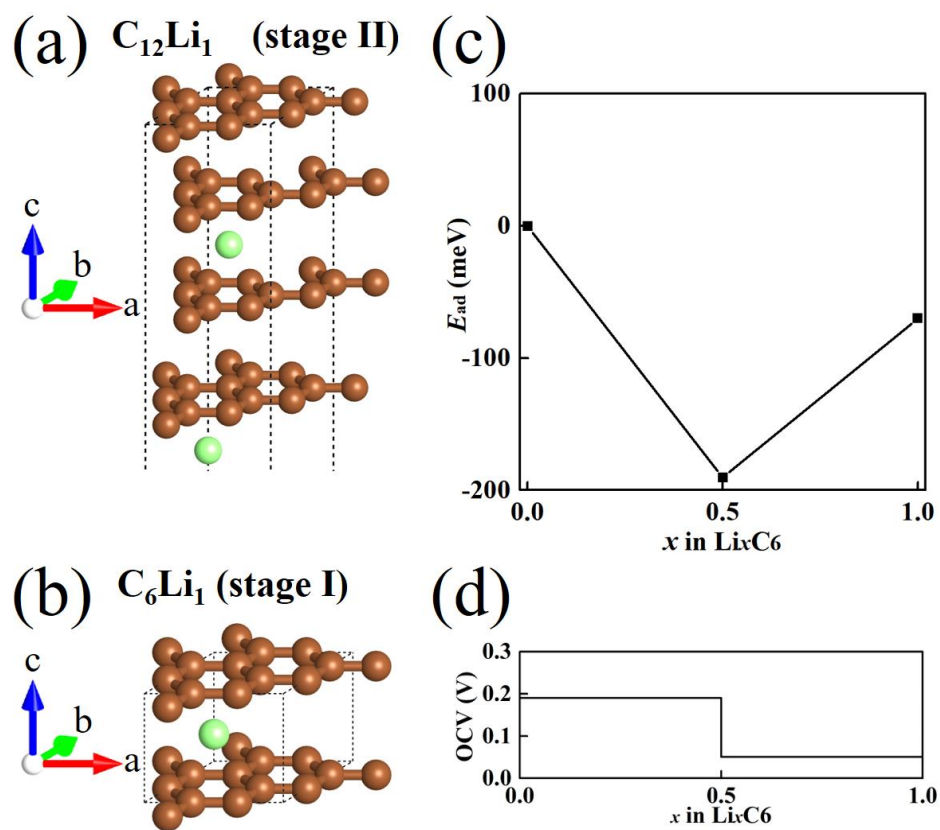

**Fig. S1** The structures of graphite with Li intercalation: (a)  $C_{12}Li_1$  and (b)  $C_6Li_1$ . (c) The Li adsorption energy on  $C_{12}Li_1$  and  $C_6Li_1$ . (d) The calculated potential of graphite anode at the level of PBE-D3.

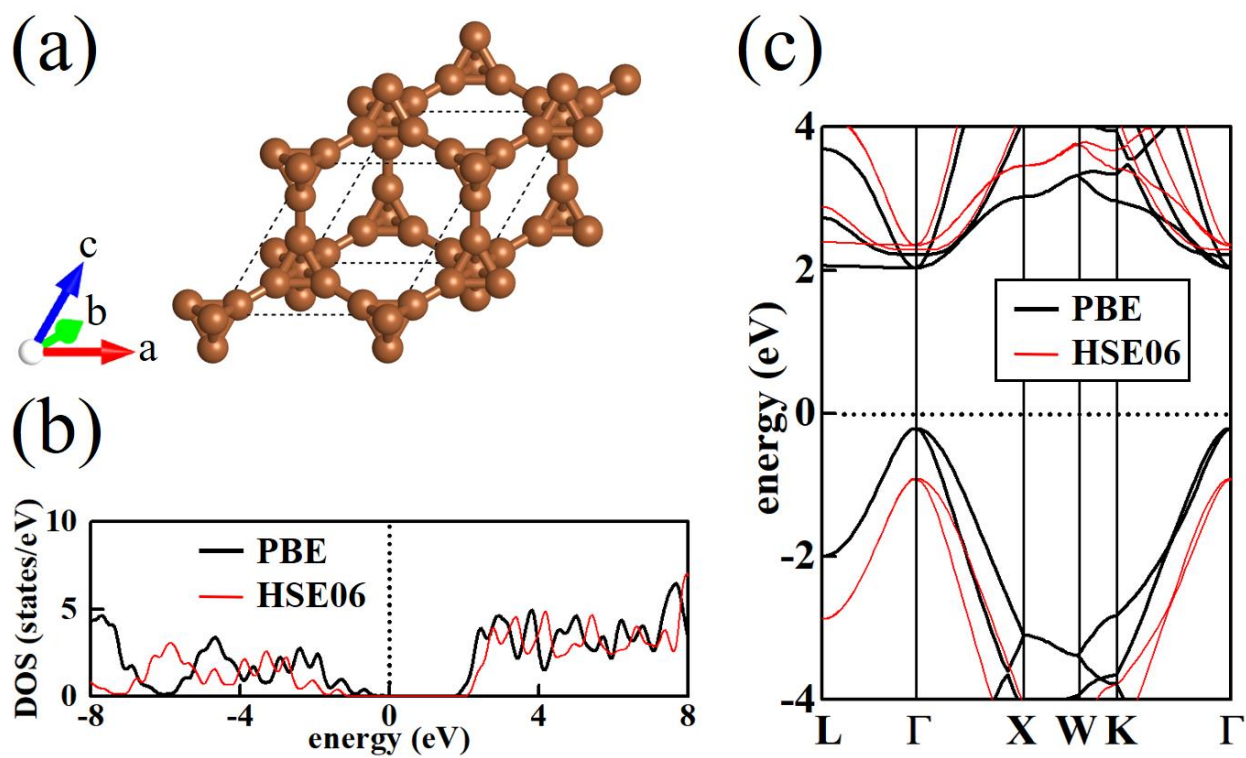

**Fig. S2** The structure (a), DOS (b) and energy bands (c) of T-carbon.
